1 Adaptation of the Arizona Cognitive Task Battery for use with the Ts65Dn Mouse Model  
2 of Down syndrome

3 Michael R. Hunsaker\*

4 Department of Psychology, University of Utah, Salt Lake City, UT

5 Genevieve K. Smith

6 Department of Psychology, University of Utah, Salt Lake City, UT

7 Raymond P. Kesner\*\*

8 Department of Psychology, University of Utah, Salt Lake City, UT

9 Author Note

10 \*Current address: Special Education Department, Granite School District, 2500 S  
11 State Street, Salt Lake City, UT 84115

12 \*\*Please send correspondence and requests for offprint copies to: Raymond P.  
13 Kesner, Department of Psychology, University of Utah

14 The authors wish to acknowledge Dr. Julie Korenberg for providing access to  
15 facilities where these experiments were conducted.

16 All authors declare they have no competing financial or professional interests.

17 This research was supported by NIH grant R01HD067731.

Abstract

18

19 We propose and validate a clear strategy to efficiently and comprehensively characterize  
20 neurobehavioral deficits in the Ts65Dn mouse model of Down syndrome. This novel  
21 approach uses neurocognitive theory to design and select behavioral tasks that test specific  
22 hypotheses concerning Down syndrome. In this manuscript we model in Ts65Dn mice the  
23 Arizona Cognitive Task Battery used to study human populations with Down syndrome.  
24 We observed specific deficits for spatial memory, impaired long-term memory for visual  
25 objects, acquisition and reversal of motor responses, reduced motor dexterity, and  
26 impaired adaptive function as measured by nesting and anxiety tasks. The Ts65Dn mice  
27 showed intact temporal ordering, novelty detection, and visual object recognition with  
28 short delays. These results phenocopy the performance of participants with Down  
29 syndrome on the Arizona Cognitive Task Battery. This approach extends the utility of  
30 mouse models of Down syndrome by integrating the expertise of clinical neurology and  
31 cognitive neuroscience into the mouse behavioral laboratory. Further, by directly  
32 emphasizing the reciprocal translation of research between human disease states and the  
33 associated mouse models, we demonstrate that it is possible for both groups to mutually  
34 inform each others' research to more efficiently generate hypotheses and elucidate  
35 treatment strategies.

36 *Keywords:* Down syndrome, Mouse Model, Ts65Dn, Attribute, Spatial Memory,  
37 Spatial Processing, Temporal Processing, Sensory/Perceptual Processing, Executive  
38 Function, Motor Function, Rule-Based Memory

39 Adaptation of the Arizona Cognitive Task Battery for use with the Ts65Dn Mouse Model  
40 of Down syndrome

41 **Introduction**

42 In order to design a battery of behavioral/neurocognitive tasks that could be  
43 presented to individuals with Down syndrome across a wide age range in a single testing  
44 session, Edgin et al. (2010) developed and validated the Arizona Cognitive Task Battery  
45 (ACTB). What makes this battery different than others that are available at present (*e.g.*,  
46 Cambridge Neuropsychological Testing Automated Battery (CANTAB)) is that the ACTB  
47 has been developed to keep the following issues in mind: 1) when one studies a population  
48 with a neurodevelopmental disease, particularly a chromosomal aneuploidy, there is a very  
49 real possibility of floor effects confounding analyses of behavioral or cognitive task  
50 performance. 2) Additionally, individuals with Down syndrome show language deficits,  
51 limiting the tasks that can be used to test cognitive function without a language confound.  
52 3) Finally, and perhaps most importantly, the ACTB was developed with the goal of  
53 maximizing the sensitivity to identify effects that are present in Down syndrome.

54 The IQ in Down syndrome is typically moderately to severely intellectually disabled  
55 range (*i.e.*, IQ = 25-55) and mental age rarely moves beyond 8 years. Paradoxically, it has  
56 been suggested that early on, Down syndrome only presents with a mild to moderate  
57 intellectual disability (*i.e.*, 55-70), but with age the IQ drops as mental age no longer  
58 increases with chronological age (Edgin et al., 2010; Virji-Babul, Kerns, Zhou, Kapur, &  
59 Shiffar, 2006).

60 It has been hypothesized that visual-spatial abilities appear to be normal in Down  
61 syndrome. However, this appears to be something of an artifact when visual-spatial  
62 memory is directly compared to auditory and verbal performance. In tests specifically  
63 assessing visual and spatial abilities in Down syndrome, there is a clear deficit relative to  
64 typically developing or age matched control populations (Edgin et al., 2010, 2012;  
65 Pennington, Moon, Edgin, Stedron, & Nadel, 2003).

66 Within the memory domain, Down syndrome results in deficits for digit or word span  
67 as well as general memory deficits with long delays prior to recall. Working memory,  
68 specifically verbal working memory, is disrupted in Down syndrome (Edgin, Spano, Kawa,  
69 & Nadel, 2014; Pennington et al., 2003; Stedron, Sahni, & Munakata, 2005; Vicari,  
70 Bellucci, & Carlesimo, 2005). For visual and spatial memory, it appears that Down  
71 syndrome results in specific memory deficits when memory span is increased (Carretti &  
72 Lanfranchi, 2010; S Lanfranchi, Carretti, Spano, & Cornoldi, 2009; Silvia Lanfranchi,  
73 Cornoldi, Vianello, & Conners, 2004). Again, as suggested by the language deficits, it has  
74 been shown that individuals with Down syndrome have greater impairments for verbal  
75 than visual-spatial span. Down syndrome also results in long-term memory deficits  
76 (Pennington et al., 2003; Vicari, 2006).

77 Despite these memory deficits, implicit memory and perceptual priming appear to be  
78 normal (Pennington et al., 2003; Vicari, 2006). This pattern suggests that there is an  
79 explicit memory deficit in Down syndrome, meaning that when memory requires temporal  
80 or spatial processing, there is a deficit. This has implicated hippocampus and medial  
81 temporal lobe function in Down syndrome pathology, as well as the prefrontal cortex for  
82 working memory. Implicit memory, dependent upon different brain areas (*e.g.*, parietal  
83 cortex), appears to be spared, if not slightly facilitated in Down syndrome compared to  
84 other cognitive domains (*i.e.*, word stem or perceptual priming tasks).

85 It has been shown that motor development in Down syndrome is slower than age and  
86 mental age matched peers. Intriguingly, early motor markers like rolling and sitting up  
87 have been shown to be only very subtly slowed in Down syndrome, but crawling and  
88 walking has been shown to be more dramatically delayed. Despite this delay, it does  
89 appear that children with Down syndrome develop through the same milestones as  
90 typically developing children, these milestones just occur dramatically later in  
91 development. Motor skill development appear to show the same developmental delays as  
92 these early markers of motor abilities (Connolly & Michael, 1986; U. Frith & Frith, 1974;

93 Gemus et al., 2002; Rast & Harris, 1985; Vicari, 2006; Virji-Babul et al., 2006).

94 To date, the majority of behavioral assays used to test the behavioral phenotype of  
95 the mouse models of Down syndrome have focused on spatial memory. More specifically,  
96 focus has been placed on the Morris water maze test of spatial memory (Escorihuela et al.,  
97 1995; Reeves et al., 1995; Sago et al., 1998). Later experiments have focused on novel  
98 object recognition at short and long delays as a proxy for general memory deficits observed  
99 across wide range of mouse disease models (Faizi et al., 2011). As a measure of executive  
100 function or rostral cortical function, spontaneous alternation has been used  
101 (A. M. Kleschevnikov et al., 2012, 2004). The majority of motor tests use the rotarod or  
102 locomotor behavior in an open field as the primary measure (Faizi et al., 2011).

103 In this study we propose and then evaluate a clear strategy to efficiently and  
104 comprehensively characterize neurobehavioral deficits in the Ts65Dn mouse model of Down  
105 syndrome by developing a mouse variant of the Arizona Cognitive Task Battery (Mouse  
106 Cognitive Task Battery; mCTB). This approach uses neurocognitive theory to design and  
107 select behavioral tasks that test specific hypotheses concerning the genetic disorder being  
108 studied-specifically those proposed as part of the Arizona Cognitive Task Battery (ACTB)  
109 used to study human populations with Down syndrome (Edgin et al., 2010; Hunsaker,  
110 2012a).

111 This approach specifically relies on known anatomical data regarding human and  
112 mouse model brain function as important considerations in task design and selection,  
113 similar to the ACTB (Edgin et al., 2010). This approach extends the utility of mouse  
114 models by integrating the expertise of clinical neurology and cognitive neuroscience into  
115 the mouse behavioral laboratory. Further, by directly emphasizing the reciprocal  
116 translation of research between human disease states and the associated mouse models, we  
117 demonstrate that it is possible for both groups to mutually inform each others' research to  
118 more efficiently generate hypotheses and elucidate treatment strategies (*cf.*, Hunsaker,  
119 2012a, 2016).

## Materials and Methods

### Animals

In this study, 10 segmentally trisomic Ts(1716)65Dn (Ts65Dn) male mice and 10 age-matched wildtype littermates were obtained from Jackson Laboratories (Bar Harbor, ME) and tested at 5-7 months of age, weighing 33 +/- 3.8g (standard error). The Ts65Dn/DnJ stock, commercially available from Jackson Laboratory (B6EiC3Sn.BLiA-Ts(1716)65Dn/DnJ), is homozygous for the wildtype allele for retinal degeneration. The stock is maintained by repeated backcrossing of Ts65Dn females to B6EiC3H F1 hybrid males derived from a new congenic strain of C3H mice. This new congenic strain (C3Sn.BLiA-Pde6b+) lacks the blindness causing recessive mutant allele. Animals were kept on a 12-h light/dark cycle, in a temperature and humidity controlled environment with *ad libitum* access to food and water. During no point in experimentation was food deprivation used. Care was taken to assure mice showed motivation to seek sucrose pellet rewards. All behavioral tests were conducted during the light portion of the cycle (06:00-18:00). Mice were housed in same-genotype groups of 2-3 per cage. Animal care and experimental testing procedures conformed to NIH, IACUC, and AALAC standards and protocols.

### Experimental Design for Behavioral Testing

The week prior to testing, all animals were handled daily for 15 min sessions and given an opportunity to habituate to a clear and red apparatus for at least 15 min each and acclimate to sucrose pellet rewards. It was verified that prior to the end of this training period that mice consumed sucrose pellets as soon as placed on the apparatus. Behavioral tasks emphasizing exploratory behaviors were presented in a pseudo-randomized order between mice (randomized within the Ts65Dn mice and a 2N wildtype littermate was yoked to a given Ts65Dn mouse to account for any potential task order effects), followed by spontaneous alternation and motor tasks, then response and

146 reversal learning tasks. The 2N wildtype mice were the same age (within 15 days of age)  
147 as the Ts65Dn mice.

148 After these tasks, mice received training on the cheeseboard, and then finally were  
149 presented with test designed to evaluate quality of life/adaptive functional measures to  
150 reduce the influence of any anxiety measures on later task performance.

151 To specifically isolate the contribution of spatial and nonspatial cues to task  
152 performance, behavioral tasks were run two times, once in a clear box and many extra  
153 maze cues, and a second time in a red box without extra maze cues (Dees & Kesner,  
154 2013). This was done because **Smith2014dentate** noticed that there was a pattern of  
155 deficits in Ts65Dn mice that were better explained by the mice having access to the  
156 extra-maze context than by any specific memory process. As such, they ran every  
157 experiment twice, one time using a clear box that allowed access to extra-maze cues and  
158 another time in a red box that blocked the view of the extra maze cues. They found that  
159 visual object recognition deficits at a 1 hour delay were seen in the clear box experiment,  
160 whereas experiments in the red box showed intact visual object memory at a 1 hour delay.  
161 They attributed this effect to extra-maze or distal context interfering with the visual  
162 object recognition due to interference. Experiments in rats exploring the same effect  
163 revealed similar results, and further unpacked the neural correlates of this effect Dees and  
164 Kesner (2013). The rationale for this procedure comes from work reported by Smith,  
165 Kesner, and Korenberg (2014) in Ts65Dn mice and Edgin et al. (2014) in children with  
166 Down syndrome showing that context is particularly influential during object recognition  
167 tasks in children with Down syndrome relative to typically developing children. In other  
168 words, children with Down syndrome are particularly susceptible to memory interference  
169 during cognitive tasks.

170 For every experiment a novel set of objects were used, such that no mouse ever  
171 encountered the same object during different experiments. At the end of every experiment,  
172 95% ethanol was used to reduce and spread olfactory cues and prevent odor effects

173 impacting future task performance.

## 174 **Tests of Spatial Attribute**

175 **Spatial Navigation using Cheeseboard.** Apparatus: A white, circular Plexiglas  
176 platform with a series of 2 cm diameter holes centered every 5 cm was used as the  
177 cheeseboard apparatus. The apparatus was placed approximately 1.5 m off the ground in a  
178 space surrounded by extra maze, distal cues to provide a rich spatial context to guide  
179 mouse navigation. Paths taken by the mice were recorded by an overhead camera and  
180 analyzed using Noldus EthoVision software.

181 Method: Each mouse was habituated to the cheeseboard for 30 min the day prior to  
182 experimentation with banana flavored sucrose pellets distributed in each hole (Bio-Serv,  
183 #F07257). All mice consumed sucrose pellets and showed a random foraging pattern prior  
184 to beginning of training. At the beginning of each trial, a single sucrose reward pellet was  
185 placed in one of the holes of the cheeseboard (located within the midpoint of the  
186 North-East, North-West, South-East or South-West quadrant). A mouse was then released  
187 at one of the cardinal points (*e.g.*, North, South, East, or West at the edge of the  
188 cheeseboard) as latency in seconds and distance in centimeters traveled to locate and  
189 consume the reward was recorded. Each day, the mouse received a trial from each of the  
190 four cardinal directions (order randomized between mice and between days within mice).  
191 There were 5 minutes separating each trial for each mouse. After the fourth day of  
192 training, the mice were given a probe trial wherein there was no reward. The search  
193 patterns of the mice were evaluated. This protocol was modified from the original rat  
194 protocol (Kesner, Farnsworth, & DiMattia, 1989) for mice after experiments reported by  
195 Lopez, Hauser, Feldon, Gargiulo, and Yee (2010).

196 **Metric/Coordinate Processing.** Apparatus: The apparatus for these  
197 experiments consisted of a large Plexiglas box 40 cm wide by 40 cm deep with clear walls  
198 40 cm in height and a dark gray floor. An inset made of translucent red Plexiglas 39 cm in



199 width x 39 cm in height was constructed for easy insertion and removal from the original  
200 clear box, therefore enabling the experimenter to block distal cues in the testing  
201 environment when desired. The box was placed on a circular white table 1 m in diameter.  
202 Four distinct two-dimensional black and white cues were placed 30 cm away from each side  
203 of the box (methods after Smith et al. (2014)). Exploration was recorded with an overhead  
204 video camera and the duration of exploration was measured with a stopwatch. Proximal  
205 objects were made from various washable, non-porous materials (plastic, metal, glass,  
206 etc.), 2-7 cm in height and had various color, pattern, and textures to ensure each object  
207 was visually distinct. New objects were used between experiments so mice were never  
208 exposed to the same object during different experiments. To prevent use of olfactory cues  
209 to guide behavior, the boxes and objects were disinfected and deodorized with a sterilizing  
210 cleaning agent after each use. The mouse was presented with entirely novel object sets for  
211 every experiment. All locomotor activity was collected by the Noldus EthoVision software  
212 calibrated to measure to the nearest cm (Noldus USA, North Carolina).

213       Method: Each mouse had previously been habituated to clear and red experimental  
214 boxes. For the metric/coordinate processing test (Hunsaker, 2012a, 2013; Hunsaker, Kim,  
215 Willemsen, & Berman, 2012, 2009; Kesner et al., 2014; Smith et al., 2014), two objects  
216 were placed in the box separated by 25 cm (from inner edges) and mice were allowed to  
217 explore the objects for 15 minutes. After a 5 min interval during which the mice were  
218 covered by an opaque, heavy cup, the objects were moved closer together to an 8 cm  
219 separation and the mouse was allowed to explore for 5 min. This procedure was carried  
220 out in the clear box that allowed the mouse to see the extra-maze, distal cues as well as in  
221 the red box that blocked the ability of the mouse to see these cues (Dees & Kesner, 2013;  
222 Smith et al., 2014). Exploration during the last 5 min of habituation and during the 5 min  
223 test session were converted into a ratio value ranging [-1,1] to control for overall  
224 exploration. As such, a ratio value approaching -1 is interpreted as the mouse showing  
225 continued habituation and thus not noticing the change. A ratio value approaching 1

226 suggest the mouse dramatically explored the change.

227 **Topological/Categorical Processing.** Apparatus: This experiment used the  
228 same apparatus as the Metric/Coordinate experiment. A similar ratio value was computed  
229 as a dependent measure.

230 Method: Each mouse had previously been habituated to clear and red experimental  
231 boxes. For the topological/categorical processing test (Hunsaker, 2012a, 2013; Hunsaker  
232 et al., 2012, 2009; Kesner et al., 2014; Lee et al., 2009; Smith et al., 2014), four objects  
233 were placed in a square in the box separated by 25 cm (from inner edges) and mice were  
234 allowed to explore the objects for 15 minutes. After a 5 min interval during which the  
235 mice were covered by a heavy cup, the front two objects were transposed, and the mouse  
236 was allowed to explore for 5 min. This procedure was carried out in the clear box that  
237 allowed the mouse to see the extra-maze, distal cues as well as in the red box that blocked  
238 the ability of the mouse to see these cues. Exploration during the last 5 min of  
239 habituation and during the 5 min test session were converted into a ratio value ranging  
240 [-1,1] to control for overall exploration. As such, a ratio value approaching -1 is interpreted  
241 as the mouse showing continued habituation and thus not noticing the change. A ratio  
242 value approaching 1 suggest the mouse dramatically explored the change in the object's  
243 spatial location and/or distance from each other.

244 **Spatial Location Recognition.** Apparatus: This experiment used the same  
245 apparatus as the Metric/Coordinate experiment. A similar ratio value was computed as a  
246 dependent measure.

247 Method: Each mouse had previously been habituated to clear and red experimental  
248 boxes. For the location recognition test (Smith et al., 2014), two objects were placed in  
249 the box separated by 25 cm (from inner edges) and mice were allowed to explore the  
250 objects for 15 minutes. After a 5 min interval during which the mice were covered by a  
251 heavy cup, one of the objects was moved at a diagonal to a new location (still 25 cm  
252 separation between the two objects), and the mouse was allowed to explore for 5 min. This

253 procedure was carried out in the clear box that allowed the mouse to see the extra-maze,  
254 distal cues as well as in the red box that blocked the ability of the mouse to see these cues.  
255 Exploration during the last 5 min of habituation and during the 5 min test session were  
256 converted into a ratio value ranging [-1,1] to control for overall exploration. As such, a  
257 ratio value approaching -1 is interpreted as the mouse showing continued habituation and  
258 thus not noticing the change. A ratio value approaching 1 suggest the mouse dramatically  
259 explored the change in which object occupied which spatial location.

## 260 **Tests of Temporal Attribute**

261 **Temporal Ordering for Visual Objects.** Apparatus: This experiment used the  
262 same apparatus as the Metric/Coordinate experiment. A similar ratio value was computed  
263 as a dependent measure.

264 Method: During session 1, two identical copies of a first object (object 1) were placed  
265 at the ends of the box 2.5 cm from the end walls and centered between the long walls  
266 (Hunsaker, 2013; Hunsaker, Goodrich-Hunsaker, Willemsen, & Berman, 2010, 2012). The  
267 mouse was placed in the center of the box facing away from both objects. The mouse was  
268 given 5 min to freely explore the objects. After 5 min, the mouse was removed to a small  
269 holding cup for 5 min. During this time, the first objects were replaced with two  
270 duplicates of a second object (Object 2). For Session 2, the mouse was again placed in the  
271 apparatus and allowed to explore. After 5 min, the mouse was removed to the holding cup  
272 for 5 min and the objects were replaced with two duplicates of a third object (Object 3).  
273 For Session 3, the mouse was given 5 min to explore. After 5 min, the mouse was removed  
274 into a small cup for 5 min and an unused copy of the first and an unused copy of the third  
275 object were placed into the box. The mouse was again placed into the box and allowed to  
276 explore the two objects (*i.e.*, Objects 1 and 3) during a 5 min test session. This procedure  
277 was carried out in the clear box that allowed the mouse to see the extra-maze, distal cues  
278 as well as in the red box that blocked the ability of the mouse to see these cues.

279 Exploration of each object during the test session were converted into a ratio value ranging  
280 [-1,1] to control for overall exploration. As such, a ratio value approaching -1 is interpreted  
281 as the mouse showing an absolute preference for the third over the first object. A ratio  
282 value approaching 1 suggest the mouse strongly explored the first over the third object.

### 283 **Temporal Order Control - Novelty Detection for Visual Objects.**

284 Apparatus: This experiment used the same apparatus as the Metric/Coordinate  
285 experiment. A similar ratio value was computed as a dependent measure.

286 Method: In addition to reflecting impaired temporal ordering, increased exploration  
287 of the first object over the third could also be interpreted as being due to difficulty in  
288 remembering the first object prior to the test session (Hunsaker, 2012a, 2013; Hunsaker  
289 et al., 2010). To minimize and control for such general memory deficits, a novelty  
290 detection of visual objects task was performed. Briefly, on a different day mice received  
291 three sessions during which they were allowed to explore three novel sets of objects  
292 (Objects 4, 5, 6) similarly to the temporal ordering tasks. During the test session, the first  
293 object and a novel fourth object (Object 7) were presented and the mice were allowed 5  
294 min to explore. This procedure was carried out in the clear box that allowed the mouse to  
295 see the extra-maze, distal cues as well as in the red box that blocked the ability of the  
296 mouse to see these cues (*cf.*, Dees and Kesner, 2013; Smith et al., 2014). Exploration of  
297 each object during the test session were converted into a ratio value ranging [-1,1] to  
298 control for overall exploration. As such, a ratio value approaching -1 is interpreted as the  
299 mouse showing an absolute preference for the familiar over the novel object. A ratio value  
300 approaching 1 suggest the mouse strongly explored the novel over the familiar object.

### 301 **Sensory/Perceptual Attribute**

302 **Feature Ambiguity.** Apparatus: This experiment used the same apparatus as the  
303 Metric/Coordinate experiment. A similar ratio value was computed as a dependent  
304 measure.

305 Method: Each mouse had previously been habituated to clear and red experimental  
306 boxes. For the configural recognition condition (Bartko, Winters, Cowell, Saksida, &  
307 Bussey, 2007; Bussey, Saksida, & Murray, 2002, 2006; Smith et al., 2014), mice were  
308 placed for 15 min in the red box containing two compound objects, A-B and C-D,  
309 separated by 15 cm. Following a 5 min delay under a heavy cup, the mouse underwent a  
310 5-min Test Phase in which one object from the Study Phase remained the same (A-B) and  
311 the other compound object is created from one component of each of the previous familiar  
312 objects, (*e.g.*, A-D). That is, the "novel" object (A-D) was composed of the same elements,  
313 but rearranged into a novel configuration. Therefore, the object is "novel" by virtue of its  
314 configuration, not by its elements, each of which was present in one of the original  
315 compound stimuli. Exploration of each compound object was scored as a single unit.  
316 Exploration during the last 5 min of habituation and during the 5 min test session were  
317 converted into a ratio value ranging [-1,1] to control for overall exploration. As such, a  
318 ratio value approaching -1 is interpreted as the mouse showing continued habituation and  
319 thus not noticing the change. A ratio value approaching 1 suggest the mouse dramatically  
320 explored the change.

321 **Feature Ambiguity Control - Novelty Detection for Configuration of**  
322 **Objects.** Apparatus: This experiment used the same apparatus as the  
323 Metric/Coordinate experiment. A similar ratio value was computed as a dependent  
324 measure.

325 Method: Each mouse had previously been habituated to clear and red experimental  
326 boxes. For the configural recognition condition (Bartko et al., 2007; Bussey et al., 2002,  
327 2006; Smith et al., 2014), mice were placed for 15 min in the red box containing two  
328 compound objects, A-B and C-D, separated by 15 cm. Following a 5 min delay under a  
329 heavy cup, the mouse underwent a 5-min control task during which C-D was replaced by  
330 two never before seen objects (E-F) was also performed. This procedure was carried out in  
331 the clear box that allowed the mouse to see the extra-maze, distal cues as well as in the

332 red box that blocked the ability of the mouse to see these cues. Exploration during the  
333 last 5 min of habituation and during the 5 min test session were converted into a ratio  
334 value ranging [-1,1] to control for overall exploration. As such, a ratio value approaching -1  
335 is interpreted as the mouse showing continued habituation and thus not noticing the  
336 change. A ratio value approaching 1 suggest the mouse dramatically explored the change.

337 **Object Recognition at 1 and 24 Hour Delays.** Apparatus: This experiment  
338 used the same apparatus as the Metric/Coordinate experiment. A similar ratio value was  
339 computed as a dependent measure.

340 Method: Each mouse had previously been habituated to clear and red experimental  
341 boxes. For the object recognition test (Moore, Deshpande, Stinnett, Seasholtz, & Murphy,  
342 2013; Smith et al., 2014), two objects were placed in the box separated by 25 cm (from  
343 inner edges) and mice were allowed to explore the objects for 15 minutes. After a 5 min  
344 interval during which the mice were covered by a heavy cup, one of the objects was  
345 replaced by a novel object that had never before been experienced by the mouse, and the  
346 mouse was allowed to explore for 5 min. This procedure was carried out in the clear box  
347 that allowed the mouse to see the extra-maze, distal cues as well as in the red box that  
348 blocked the ability of the mouse to see these cues. This procedure was carried out in each  
349 box separately for delays of 1 hour and 24 hours. Exploration during the last 5 min of  
350 habituation and during the 5 min test session were converted into a ratio value ranging  
351 [-1,1] to control for overall exploration. As such, a ratio value approaching -1 is interpreted  
352 as the mouse showing continued habituation and thus not noticing the change. a ratio  
353 value approaching 1 suggest the mouse dramatically explored the change.

#### 354 **Tests of Executive Function**

355 **Spontaneous Alternation.** Apparatus: For this experiment, a Y maze with each  
356 arm measuring 45 cm in length by 30 cm in height with a runway width of 6 cm was used.  
357 It was made from opaque gray Plexiglas to prevent the use of any extra-maze cues to

358 guide behavioral performance. As this was a spontaneous alternation task, no rewards  
359 were provided at the end of the arms of the Y maze.

360 Method: Mice were placed in the stem of a Y maze and allowed to explore (Faizi  
361 et al., 2011; A. M. Kleschevnikov et al., 2012, 2004). Whenever the mouse entered one of  
362 the arms of the Y maze with all four limbs their response was recorded. Upon reaching the  
363 end of the arm, the mouse was gently picked up and replaced in the stem of the Y maze.  
364 The number of times the mouse alternated (*i.e.*, did not repeat the previous turn), was  
365 recorded as an alternation.

366 **Response Learning.** Apparatus: For this experiment, a plus maze with each arm  
367 measuring 50 cm in length by 25 cm in height with a runway width of 8 cm was used.  
368 There was a 2 cm diameter depression at the end of the arms wherein a sucrose pellet was  
369 placed to reward a correct response. It was made from opaque gray Plexiglas to prevent  
370 the use of any extra-maze cues to guide behavioral performance. At any time the mouse  
371 was required to make a 90 degree turn to the right or left to make a choice. The remaining  
372 arm was blocked off using a gray Plexiglas block that fit snugly into the arms of the plus  
373 maze.

374 Method: Mice were placed in the stem of a plus maze with one of the arms blocked  
375 off (forming a T maze). Mice were given five trials to determine if there was any  
376 preference for one direction over the other. As no such preference was observed, mice were  
377 randomly assigned the rule to turn right or turn left. Mice received 20 trials per day for 4  
378 days (Bissonette et al., 2008; Ragozzino, Detrick, & Kesner, 1999, 2002). Entry into an  
379 arm with all four limbs was recorded as a choice and mice were not allowed to self correct  
380 when they made mistakes. Upon reaching the end of the arm, the mouse was gently picked  
381 up and replaced in the stem of the plus maze.

382 **Reversal Learning.** Apparatus: This experiment is a continuation of the  
383 Response acquisition experiment and used the same apparatus. For this experiment, the  
384 previously rewarded arm was now unrewarded and the previously unrewarded arm was

385 now rewarded by a sucrose pellet.

386       Method: The day after mice finished training on response learning, they received 80  
387 trials of reversal training (Bissonette et al., 2008; Ragozzino et al., 1999, 2002). This  
388 means that the turn the mice had just learned to make for reward was now incorrect,  
389 rather the mice had to make the opposite turn to receive reward. Upon reaching the end  
390 of the arm, the mouse was gently picked up and replaced in the stem of the plus maze.  
391 Number of previously correct choices made were recorded as errors and error type was  
392 evaluated as perseverative or regressive based on the work of Aggleton and Ragozzino  
393 (Ragozzino et al., 2002; E. C. Warburton, Baird, Morgan, Muir, & Aggleton, 2001;  
394 E. Warburton, Baird, Morgan, Muir, & Aggleton, 2000). Briefly, errors during trials 1-20  
395 were considered perseverative errors (perseverating or inflexibly following a previously  
396 learned rule) and errors during trials 21-40 were considered regressive errors (regressing or  
397 returning to a previously learned rule). Additionally, a behavioral change point algorithm  
398 was used to define the point at which each mouse consistently switched their responses  
399 from the previously learned rule to the new rule. This was done after the work reported by  
400 Diep et al. (2012) by taking the derivative of the learning curve at each point and  
401 evaluating when the derivative significantly changed slope (analysis code available at  
402 [http://www.github.com/mrhunsaker/Change\\_Point](http://www.github.com/mrhunsaker/Change_Point)).

### 403 **Motor Function**

404       **Capellini Handling.** Apparatus: For this experiment, a 250 mL Nalgene beaker  
405 was used as a testing environment to assist in video recording mouse behavior. A small  
406 mirror was set up behind the beaker and the camera was placed to capture a front and  
407 rear view of the mouse to record trials.

408       Method: Mice were habituated over a weekend with approximately 20-30 dried  
409 capellini pasta presented in their cages (Tennant et al., 2010). Each mouse was placed in a  
410 250 mL beaker and given a 5 cm piece of dried capellini. Their behaviors while eating



411 were recorded for an offline analysis of their motor behaviors. Their latency to finish each  
412 piece of pasta was recorded, as were abnormal behaviors including the mouse having its  
413 paws together while eating, losing contact with the pasta with one or both paws, and  
414 using the mouth to pull the pasta rather than using the digits to feed the pasta into the  
415 mouth.

416 **Parallel Rung Walking.** Apparatus: Mice were placed in a box measuring 15 cm  
417 wide by 15 cm deep by 45 cm tall with 1.5 mm diameter parallel rungs making up the  
418 floor. The rungs were designed with same spacing used by Hunsaker et al. (2011).  
419 However, as this was a box rather than a runway, locomotor activity was collected using  
420 the Noldus EthoVision software to evaluate any effects of locomotor activity on motor  
421 coordination.

422 Method: The mice were allowed to freely explore the box for 5 minutes (Cummings,  
423 Engesser-Cesar, Cadena, & Anderson, 2007; Farr, Liu, Colwell, Whishaw, & Metz, 2006;  
424 Hunsaker et al., 2011). The number of times a paw slipped through the parallel rod floor  
425 beyond the wrist or ankle, a "foot slip" error was recorded (protocol simplified after Farr  
426 et al. (2006)). Total number of steps was also recorded to be used as an adjustment factor  
427 in later analyses.

## 428 **Adaptive Function**

429 **Nesting Behaviors.** Apparatus: A 10 cm long piece of 5 cm diameter PVC pipe  
430 capped at one end was used as the apparatus. Sawdust similar to that used as mouse  
431 bedding was used as a nesting substrate.

432 Method: Sawdust was used to fill a 10 cm long piece of 5 cm diameter PVC pipe  
433 that was capped at one end (dry fit, no glue was used). This pipe was placed in a cage  
434 with each mouse and the latency to contact the sawdust in the pipe, the latency to start  
435 digging in the sawdust, and the latency to finalize the nest were recorded (Filali &  
436 Lalonde, 2009).

437 **Neophobia.** Apparatus: The home cage of the mouse, a 35 cm diameter metal  
438 platter, and a novel white Plexiglas box measuring 15 cm in all dimension were used to  
439 assess neophagia.

440 Method: Mice were given three neophobia tests (specifically hyperneophagia tests)  
441 based on the work of Bannerman et al. (2002). The first test was in each mouse's home  
442 cage. Each mouse was provided a food they had never encountered (Cheerios cereal) and  
443 the latency for the mouse to take the first bite was recorded. The second test was each  
444 mouse was placed on a large platter in a bright area in the testing room and the latency  
445 for the mouse to take a bite from a reward pellet (familiar food) was recorded. The final  
446 test consisted of each mouse being placed in a novel white box and fed a Cheerio that had  
447 been stored in a sealed container filled with thyme overnight, resulting in a novel food  
448 (Vale-Martínez, Baxter, & Eichenbaum, 2002). Again, latency for the mouse to take the  
449 first bite was recorded.

## 450 **Statistical Methods**

451 **Dependent Measures and Data Visualization.** For the Dry Land Watermaze  
452 on the cheeseboard, mean latency to reach the rewarded location as well as total path  
453 length were collected using the EthoVision software. The learning curves were normalized  
454 to percentage of 1st day latencies and distances to specifically ascertain if there were  
455 differences in the shape of the learning curves.

456 For the probe trial, mean distance from the reward location as well as percent time  
457 in the quadrant of the cheeseboard containing the previously rewarded location were  
458 collected.

459 For all exploratory tasks (Spatial, Temporal, and Sensory/Perceptual tasks), ratio  
460 values were computed after the following formula: Exploration of the object of interest (or  
461 all objects in the 5 min session of interest) minus the exploration of the other objects or  
462 last 5 min of the habituation session. This was divided by the sum of all exploration

463 across both sessions or of both objects. As a formula this is depicted as:  $(A-B)/(A+B)$ .

464 For the reversal learning, the number of perseverative errors (continuing old rule)  
465 during the first 20 (1-20) trials were computed. The number of regressive errors (returning  
466 to old rule) were calculated during trials 21-40. A frequentist change point algorithm  
467 developed by Gallistel, Fairhurst, and Balsam (2004) and translated in the R programming  
468 language by Diep et al. (2012) was used to compute the point at which each mouse showed  
469 evidence for having learned to apply the new rule (analysis code available for download at  
470 [http://github.com/mrhunsaker/Change\\_Point](http://github.com/mrhunsaker/Change_Point)). This code takes the derivative of the  
471 learning curve at every point and determines when the slope has significantly changed.

472 The threshold for significant change was conservatively set at  $p < .001$  for the current task.

473 Data were all plotted in DataGraph (4.01 beta, Visual Data Tools, Inc. Chapel Hill,  
474 NC.). Ratio data and computed factors are plotted as bar graphs with standard error of  
475 the mean (SEM) error bars. Repeated data/learning curves are presented as a line graph  
476 at the mean of each block with SEM error bars.

477 **Tests for equal variance and heteroscedasticity.** Prior to statistical analyses,  
478 the data were tested for normalcy (Shapiro-Wilk test) and homoscedacity  
479 (Browne-Forsythe test) to determine if the data met the assumptions for parametric  
480 analyses of variance (ANOVA). Repeated measures were evaluated for sphericity using  
481 Mauchly's test of sphericity and necessary adjustments were made using the Huhn-Feldt  
482 correction using R 3.2.4 (Team, 2014).

483 **Parametric Statistical Analysis.** Once deemed appropriate, further statistical  
484 analyses were performed using parametric analyses of variance (ANOVA). For exploratory  
485 task ratios and computed factors were compared using a one-way ANOVA with groups  
486 (2N control, Ts65Dn). For acquisition tasks wherein learning was quantified across trials  
487 as well as locomotor data, statistical analyses were performed using a mixed model  
488 ANOVA with group (2N control, Ts65Dn) as a between groups factor and block of trials as  
489 a repeated within factor. If locomotor activity was significantly different between the

490 groups during any trial, locomotor activity was included in the statistical analysis as a  
491 covariate.

492 All results were considered significant at an  $\alpha < .05$  and Power  $(1-\beta) > .80$ : Analyses  
493 were performed to determine observed power and effect size for all reported effects.  
494 Statistical analyses were performed in R 3.2.4 language and environment and observed  
495 statistical power was calculated using both R and the statistical program G\*Power 3  
496 (Faul, Erdfelder, Buchner, & Lang, 2009, 2007). All reported p values were adjusted for  
497 False Discovery Rate (Benjamini, Drai, Elmer, Kafkafi, & Golani, 2001; Hunsaker, 2013)  
498 using a custom script written in R 3.2.4 (Team, 2014).

## 499 Results

### 500 Spatial Attribute

501 **Cheeseboard.** To evaluate spatial navigation and general spatial memory, mice  
502 were tested on a dry land version of the Morris water maze (cheeseboard). The Ts65Dn  
503 mice showed deficits relative to 2N control mice for raw latency to find reward (Figure 1a;  
504 groups ( $F(1,76)=185.645$ ,  $p < .0001$ ), no interaction among group and trial block  
505 ( $F(1,76)=0.333$ ,  $p = .566$ )). These deficits are present as well when the data are adjusted  
506 for total latency on trial 1 (groups ( $F(1,76)=48.44$ ,  $p < .0001$ ); Figure 1b) Ts65Dn mice have  
507 impaired learning in the Ts65Dn mice in the adjusted data ( $F(1,76)=14.74$ ,  $p = .00025$ ).  
508 The same pattern of effects was observed for the data when evaluated for raw distance  
509 covered to find reward (Figure 1c; groups ( $F(1,76)=88.406$ ,  $p < .0001$ ) no interaction among  
510 group and block ( $F(1,76)=0.258$ ,  $p = .613$ ). Similarly to the latency data, an interaction  
511 emerges with Ts65Dn mice showing a shallower learning curve when the data are adjusted  
512 for total distance on trial 1 (groups ( $F(1,76)=25.194$ ,  $p < .0001$ ), interaction  
513 ( $F(1,76)=3.887$ ,  $p = .0523$ ); Figure 1d).

514 During the probe trial (Figure 1), Ts65Dn mice spent significantly less time in the  
515 quadrant where the reward was previously located (Figure 1e,  $F(1,18)=91.25$ ,  $p < .0001$ ).

516 Ts65Dn mice also on average were a further distance away from the previously rewarded  
517 spatial location ( $F(1,18)=41.7$ ,  $p<.0001$ ; Figure 1f).

518 **Metric/Coordinate processing.** To evaluate dentate gyrus dependent spatial  
519 processing, mice were tested for detection of a metric change (Figure 2a), Ts65Dn mice  
520 showed significant impairments relative to 2N control mice. There was a main effect for  
521 groups for the clear box ( $F(1,18)=39.38$ ,  $p<.0001$ ) as well as the red box ( $F(1,18)=29.94$ ,  
522  $p<.0001$ ). Deficits in both the clear and red box suggest that metric/coordinate processing  
523 is specifically impaired in Ts65Dn mice, supporting earlier reports of dentate gyrus  
524 dysfunction in Ts65Dn mice.

525 **Topological/Categorical processing.** To evaluate parietal lobe dependent  
526 spatial processing, mice were tested for detection of a topological change (Figure 2b),  
527 Ts65Dn mice showed significant impairments relative to 2N control mice. There was a  
528 main effect for groups for the clear box ( $F(1,18)=78.52$ ,  $p<.0001$ ) but not for the red box  
529 ( $F(1,18)=1.489$ ,  $p=.238$ ). Deficits in only the clear box suggests that topological  
530 processing is only impaired when extra-maze cues are present, suggesting a general spatial  
531 memory deficit rather than one specific to topological/categorical processing.

532 **Location Recognition.** To test general spatial memory, mice were tested for  
533 detection of a change in the spatial location of a visual object (Figure 2c), Ts65Dn mice  
534 showed significant impairments relative to 2N control mice. There was a main effect for  
535 groups for the clear box ( $F(1,18)=36.39$ ,  $p<.0001$ ) as well as in the red box ( $F(1,18)=62.0$ ,  
536  $p<.0001$ ), suggesting spatial novelty detection deficits in Ts65Dn mice.

### 537 **Temporal Attribute**

538 **Temporal Ordering of Visual Objects.** To test CA1 function in Ts65Dn mice,  
539 mice were tested for a simple temporal ordering task (Figure 2d). Ts65Dn mice did not  
540 show significant impairments relative to 2N control mice. There was a main effect for  
541 groups for the clear box ( $F(1,18)=68.24$ ,  $p<.0001$ ) but not for the red box ( $F(1,18)=2.267$ ,

542 p=.149). These data suggest that the presence of spatial cues, but not temporal ordering  
543 resulted in deficits in the clear box. For the novelty detection task run as a control for  
544 temporal ordering (Figure 2e), Ts65Dn mice did not show significant impairments relative  
545 to 2N control mice. There was a main effect for groups for the clear box ( $F(1,18)=82.78$ ,  
546  $p<.0001$ ) but not for the red box ( $F(1,18)=2.909$ ,  $p=.105$ ). These data suggest that the  
547 presence of spatial cues, but not temporal ordering or novelty detection resulted in deficits  
548 in the clear box.

### 549 **Sensory/Perceptual Attribute**

550 **Feature Ambiguity.** To test perirhinal function in Ts65Dn mice, a configural  
551 feature ambiguity test was given (Figure 3a). Ts65Dn mice did not show significant  
552 impairments relative to 2N control mice. There was a main effect for groups for the clear  
553 box ( $F(1,18)=34.13$ ,  $p<.0001$ ) but not for the red box ( $F(1,18)=.021$ ,  $p=.984$ ). These data  
554 suggest that the presence of spatial cues, but not configural feature ambiguity resulted in  
555 deficits in the clear box. Ts65Dn mice were not impaired in a configural ambiguity control  
556 task (Figure 3b). There was a main effect for groups for the clear box ( $F(1,18)=12.27$ ,  
557  $p=.0025$ ) but not for the red box ( $F(1,18)=.012$ ,  $p=.916$ ). These data suggest that the  
558 presence of spatial cues, but not configural feature novelty detection ordering resulted in  
559 deficits in the clear box.

560 **Object Recognition after 1 and 24 delays.** Object memory was tested in  
561 Ts65Dn mice using object recognition memory at 1 and 24 hours (Figure 3c), Ts65Dn mice  
562 did not show significant impairments relative to 2N control mice. There was a main effect  
563 for groups for the clear box ( $F(1,18)=29.51$ ,  $p<.0001$ ) but not for the red box  
564 ( $F(1,18)=.908$ ,  $p=.353$ ). These data suggest that the presence of spatial cues, but not  
565 object recognition resulted in deficits in the clear box. For object recognition memory at  
566 24 hours (Figure 3d), there was a main effect for groups for the clear box ( $F(1,18)=46.23$ ,  
567  $p<.0001$ ) as well as for the red box ( $F(1,18)=31.36$ ,  $p<.0001$ ). These data suggest that at

568 24 hours, the Ts65Dn mice were unable to retrieve the memory for the object, whereas  
569 they were able to do so at 1 hour.

## 570 **Executive Function**

571 **Spontaneous Alternation.** Spontaneous alternation was used to test working  
572 memory in the Ts65Dn mice (Figure 4a). Ts65Dn mice showed fewer alternations than 2N  
573 control mice ( $F(1,18)=23.85$ ,  $p=.0001$ ).

574 **Rule Learning on a Plus Maze.** To evaluate inhibitory control and the ability  
575 to learn a turn response (Figure 4b), Ts65Dn mice took significantly longer to learn the  
576 rule than 2N control mice. There was a main effect for groups ( $F(1,76)=4.24$ ,  $p=.013$ ), a  
577 main effect for block of trials ( $F(1,76)=502.86$ ,  $p<.0001$ ). There was also an interaction  
578 among group and block ( $F(1,76)=7.82$ ,  $p=.0065$ ). This interaction was the result of the  
579 Ts65Dn mice taking longer to learn the rule. For the final block of 20 trials, there were no  
580 differences in performance for Ts65Dn and 2N control mice.

581 **Rule Reversal Learning on a Plus Maze.** To evaluate rule reversal learning  
582 (behavioral flexibility) in Ts65Dn mice, the reversal of a turn response was evaluated  
583 (Figure 4c). Ts65Dn mice took a significantly greater number of trials to learn the rule  
584 than 2N control mice. There was a main effect for groups ( $F(1,76)=4.952$ ,  $p=.029$ ), a main  
585 effect for block of trials ( $F(1,76)=24.62$ ,  $p<.0001$ ). There was also a nonsignificant  
586 interaction among group and block ( $F(1,76)=3.21$ ,  $p=.077$ ). Looking at Figure 4c, the  
587 nonsignificant interaction was the result of the Ts65Dn mice taking longer to learn to  
588 reverse the rule. In fact, the Ts65Dn mice were only impaired relative to the 2N control  
589 mice for the first block of 20 trials. For the remaining blocks of trials there were no  
590 differences in performance for Ts65Dn and 2N control mice. There was a main effect for  
591 groups for the trial at which the mice changed preference from old rule to new rule  
592 (change point;  $F(1,18)=21.43$ ,  $p=.0002$ ; Figure 4d). For the first 20 trials of reversal  
593 learning, Ts65Dn mice showed a greater number of perseverative errors ( $F(1,18)=11.98$ ,

594  $p=.0028$ ; Figure 4e). For trials 21-40, there was no difference between Ts65Dn mice and  
595 2N control mice for regressive errors ( $F(1,18)=.287$ ,  $p=.599$ ; Figure 4f).

## 596 **Motor Function**

597 **Capellini Eating Task.** For the capellini task of manual dexterity (Figure 5),  
598 Ts65Dn mice showed significant impairments relative to 2N control mice. There was a  
599 main effect for latency, with Ts65Dn mice taking longer to eat the pasta on average  
600 ( $F(1,18)=14.74$ ,  $p=.0012$ ; Figure 5a). Ts65Dn mice also made a greater number of pasta  
601 handling errors ( $F(1,18)=92.68$ ,  $p<.0001$ ; Figure 5b). There was also a main effect for  
602 groups for the number of times the paws came together ( $F(1,18)=42.34$ ,  $p<.0001$ ;  
603 Figure 5c), for the number of times the mouse lost contact with the pasta ( $F(1,18)=20.35$ ,  
604  $p=.0003$ ; Figure 5d) and the number of times the mouse pulled the pasta with their mouth  
605 rather than using the hands to move it ( $F(1,18)=21.46$ ,  $p=.0002$ ; Figure 5e).

606 **Parallel Rung Walking Task.** During a parallel rung walking task (Figure 5f),  
607 Ts65Dn mice showed significant impairments relative to 2N control mice. There was a  
608 main effect for the number of foot slips in a 1 minute session ( $F(1,18)=27.32$ ,  $p<.0001$ ).  
609 When adjusted for number of steps, Ts65Dn mice still showed a greater number of foot  
610 slip errors ( $F(1,18)=11.70$ ,  $p=.0031$ ; Figure 5g).

## 611 **Adaptive Function / Quality of Life**

612 **Nesting Behavior.** Ts65Dn mice showed significant impairments relative to 2N  
613 control mice for measures of nesting (Figure 6). Ts65Dn mice took longer to make contact  
614 with the nesting material ( $F(1,18)=152.9$ ,  $p<.0001$ ; Figure 6a), for the time it took for  
615 them to dig in the media (measured from time of first contact) ( $F(1,18)=318.6$ ,  $p<.0001$ ;  
616 Figure 6b), and the time it took from starting to dig to finish the nest ( $F(1,18)=94.3$ ,  
617  $p<.0001$ ; Figure 6c).

618 **Neophobia.** Ts65Dn mice showed significant impairments relative to 2N control  
619 mice for neophobia (Figure 6). Ts65Dn mice took longer to eat a novel food in a familiar



620 environment ( $F(1,18)=19.59$ ,  $p=.0003$ ; Figure 6d), took longer to eat a familiar food in a  
621 novel environment ( $F(1,18)=40.87$ ,  $p<.0001$ ; Figure 6e), and took longer to eat a novel  
622 food in a novel environment ( $F(1,18)=83.74$ ,  $p<.0001$ ; Figure 6f).

## 623 Discussion

624 Briefly, Ts65Dn mice displayed specific deficits for spatial processing, long-term  
625 memory, motor function, executive function, and adaptive function (Table 1). These  
626 deficits phenocopy the results from the ACTB used in testing children with Down  
627 syndrome, including the report that providing distracting contextual cues may impair  
628 memory function in Down syndrome (Edgin et al., 2010, 2012, 2014).

629 Overall, these data clearly demonstrate that the Ts65Dn mouse do in fact show a  
630 similar pattern of behavioral deficits on the mouse variant of the Arizona Cognitive Task  
631 Battery (mCTB) as individuals with Down syndrome show on the human ACTB. The  
632 task similarities between the mouse and human ACTB are outlined in Table 1. In cases  
633 where Down syndrome participants show deficits on the ACTB (Edgin et al., 2010), the  
634 mice in the present study phenocopy those effects (also *cf.*, Edgin et al. (2012)). Similarly,  
635 the Ts65Dn mice showed the same pattern of strengths as Down syndrome individuals  
636 showed on the ACTB.

637 The pattern of Ts65Dn performance on spatial and temporal processing tasks  
638 support the hypothesis that Ts65Dn mice show clear deficits for spatial processing tasks  
639 dependent upon the dentate gyrus with sparing of spatial and temporal processing  
640 dependent upon the CA1 subregion (Goodrich-Hunsaker, Hunsaker, & Kesner, 2008;  
641 Kesner, Lee, & Gilbert, 2004; Kesner & Rolls, 2015; Rolls & Kesner, 2006; Smith et al.,  
642 2014). Similarly, it appears that spatial processing dependent on neocortical processing is  
643 spared (*cf.*, Goodrich-Hunsaker, Hunsaker, and Kesner (2005)).

644 These findings were confirmed by verifying that any spatial or temporal processing  
645 deficits observed in the presence of distal cues was confirmed in a task that removed these

646 cues (Dees & Kesner, 2013). The data show that metric/coordinate processing and  
647 location recognition deficits are similar in the presence or absence of distal cues, suggesting  
648 that these hippocampus (more specifically the dentate gyrus) dependent spatial processes  
649 are disrupted. The topological/categorical deficits observed in the clear box are absent  
650 when tested in the absence of extramaze cues in a red box. These data suggest that  
651 CA1/parietal cortex related spatial memory processes are intact when tested without  
652 extra-maze cues available (*cf.*, Kesner et al. (2004), Kesner and Rolls (2015)).

653 Similarly, the temporal ordering deficits present in the clear box were absent in the  
654 red box, and the novelty detection control task showed the same pattern, suggesting  
655 temporal processing is intact in the Ts65Dn mice, but object identification may be  
656 impaired if extra-maze distal cues are present. This hypothesis was confirmed in the  
657 sensory/perceptual tests wherein the Ts65Dn mice were able to correctly process feature  
658 ambiguity and feature novelty in the red, but not clear boxes. And finally, object  
659 recognition was impaired even at only 1 hour delays for Ts65Dn mice when extramaze cues  
660 were available. In the red box, the Ts65Dn mice were able to identify previously  
661 encountered objects until a 24 hour delay was imposed.

662 For response learning or executive function, Ts65Dn mice were impaired for  
663 spontaneous alternation (they alternated on fewer trials than wildtype mice), as well as  
664 response learning and reversal learning of a previously learned rule. However, it appeared  
665 that the Ts65Dn mice just learned the tasks more slowly since the early trials show deficit,  
666 but later blocks of trials do not. For reversal learning, it is clear the Ts65Dn mice take a  
667 greater number of trials to learn the reversal based on the changepoint calculated for the  
668 learning curves (Ts65Dn mean=50 compared to mean=30 for 2N wildtype mice) as well as  
669 the greater number of perseverative errors during trials 1-20 of the reversal learning task.  
670 Interestingly, once the Ts65Dn mice showed learning of the reversal, they did not make  
671 any more regressive errors than the 2N control mice.

672 These data support earlier theories that suggested there were specific deficits to

673 spatial memory in Down syndrome (Carlesimo, Marotta, & Vicari, 1997; Carretti &  
674 Lanfranchi, 2010; S Lanfranchi et al., 2009; Silvia Lanfranchi et al., 2004; Vicari et al.,  
675 2005; Visu-Petra, Benga, & Miclea, 2007). What these data clarify are the neural  
676 substrates and specific domains of medial temporal lobe function are impaired in Down  
677 syndrome. There are specific deficits on tasks that test dentate gyrus function, but sparing  
678 of function on tasks that test parietal and perirhinal cortices as well as CA1 function.  
679 Similarly, there are specific deficits in the Ts65Dn mouse that are attributable to  
680 cerebellar function and executive functional deficits attributable to the rostral cortices  
681 (analogue of the human prefrontal cortex). For thorough descriptions of neuroanatomic  
682 correlates of the behavioral tasks included in the mCTB the reader is referred to the  
683 descriptions of the original tasks (*cf.*, Bartko et al. (2007), Bussey et al. (2002), Kesner  
684 et al. (2004), Kesner and Rolls (2015), Ragozzino et al. (1999, 2002), Rolls and Kesner  
685 (2006)

686 For the motor tasks, the Ts65Dn mice showed clear deficits for handling the capellini  
687 and greater difficulties walking on parallel rungs. For adaptive function, the Ts65Dn mice  
688 took longer to build nests and consume novel foods in novel locations, suggesting reduced  
689 adaptive function or quality of life relative to 2N control mice.

690 An important consideration in adopting a behavioral screen like this mCTB is the  
691 relative throughput for the tasks. All of the tasks used to test medial temporal lobe  
692 function take 30 minutes per session of testing, and can be repeated numerous times on  
693 any given mouse after 24 hours have passed since the first test. The motor and adaptive  
694 function tests are similarly high throughput, as is the spontaneous alternation task. The  
695 only tasks that require a significant time investment are the dry land watermaze (Lopez  
696 et al., 2010) on the cheeseboard and the rule acquisition and rule reversal learning tasks  
697 (Bissonette et al., 2008; Ragozzino et al., 1999, 2002). The dry land watermaze task on  
698 the cheeseboard follows a standard water maze protocol that lasts 5 days, and the  
699 response learning and reversal learning tasks together take an additional week.

700 A second consideration is adopting the mCTB is the advantage of the anatomical  
701 specificity of known neural substrates underlying each behavioral task (Bartko et al., 2007;  
702 Bussey et al., 2002, 2006; Farr et al., 2006; Goodrich-Hunsaker et al., 2005, 2008;  
703 Hunsaker, 2012a; Kesner et al., 2004; Kesner & Rolls, 2015) and previous comparison of  
704 rodent performance on many of the behavioral tasks to human cognitive function  
705 (Baumann, Chan, & Mattingley, 2012; Baumann & Mattingley, 2013; Goodrich-Hunsaker  
706 & Hopkins, 2010; Goodrich-Hunsaker et al., 2005; Kesner & Goodrich-Hunsaker, 2010). As  
707 such, these tasks can be used to dissociate function of brain areas within the mouse  
708 models being tested. The final consideration is the lack of negative reinforcement or  
709 aversive stimulus. This means mouse models displaying depression, anxiety, or anhedonia  
710 are theoretically testable using the mCTB (*cf.*, Hunsaker (2012a, 2012b)).

711 An interesting complication emerged in the data that the mCTB was solved by  
712 nature of how it was designed. On a number of nonspatial tasks, there was a confound of  
713 distal cues interfering with the processing of proximal objects that were of interest in the  
714 task. For example, in the temporal ordering and novelty detection for novel objects tasks,  
715 the Ts65Dn mice looked like they had deficits, but only in the clear box that allowed  
716 access to distal cues (Dees & Kesner, 2013; Smith et al., 2014). The feature ambiguity  
717 task and the control condition showed the same pattern. The addition of a distal cue-free  
718 condition (the red box) was essential for separating the effects of proximal-distal cue  
719 interactions from the memory processes being tested by the tasks. The disparate  
720 performance across clear and red boxes (or in presence of absence of extra maze contextual  
721 cues) allowed us to assess the role of context and distracting cues in memory function in  
722 Ts65Dn mice, a conceptual replication of Edgin et al. (2014) in Down syndrome and rats  
723 as shown by Dees and Kesner (2013).

724 **Limitations**

725 The primary limitation of the present study is the lack of tests for language or  
726 language like attributes in the Ts65Dn mouse model. However, such assays exist and can  
727 easily be added to the task battery without significantly increasing the amount of time  
728 required to perform the mCTB (Zampieri, Fernandez, Pearson, Stasko, & Costa, 2014).  
729 The present experiment also only assayed the Ts65Dn mouse model of Down syndrome as  
730 a proof of concept. Further studies will be necessary to evaluate whether other mouse  
731 models of Down syndrome (*e.g.*, Ts2Cje, Ts1Yah, and Dep(17)1Yey/+; Das and Reeves  
732 (2011)) show the same pattern of results as the Ts65Dn mouse model.

733 **Conclusions**

734 That deficits in the mouse and human ACTB are comparable suggests that the  
735 mCTB may be useful for guiding the development of treatment strategies by providing  
736 reliable, valid behavioral endpoints and outcome measures. These outcome measures  
737 reported in the mCTB appear to show high face, content, and predictive validity with the  
738 ACTB, at least so far as Ts65Dn performance mimics the performance of Down syndrome  
739 patient populations. As we were able to identify such a clear phenotype in Ts65Dn mice,  
740 the mouse mCTB may well turn out to be a useful tool for studying behavioral prodrome  
741 of early Alzheimer-like pathology and cognitive decline in mouse models related to Down  
742 syndrome. Similarly, the mCTB may serve as a powerful and comprehensive screening tool  
743 for preclinical tests of pharmacological interventions in Down syndrome.

744

References

745

746 Bannerman, D., Deacon, R., Offen, S., Friswell, J., Grubb, M., & Rawlins, J. (2002).

747 Double dissociation of function within the hippocampus: spatial memory and

748 hyponeophagia. *Behavioral neuroscience*, *116*(5), 884.

749 Bartko, S. J., Winters, B. D., Cowell, R. A., Saksida, L. M., & Bussey, T. J. (2007).

750 Perirhinal cortex resolves feature ambiguity in configural object recognition and

751 perceptual oddity tasks. *Learning & Memory*, *14*(12), 821–832.

752 Baumann, O., Chan, E., & Mattingley, J. B. (2012). Distinct neural networks underlie

753 encoding of categorical versus coordinate spatial relations during active navigation.

754 *Neuroimage*, *60*(3), 1630–1637.

755 Baumann, O. & Mattingley, J. B. (2013). Dissociable roles of the hippocampus and

756 parietal cortex in processing of coordinate and categorical spatial information.

757 *Frontiers in human neuroscience*, *8*, 73–73.

758 Benjamini, Y., Drai, D., Elmer, G., Kafkafi, N., & Golani, I. (2001). Controlling the false

759 discovery rate in behavior genetics research. *Behavioural brain research*, *125*(1),

760 279–284.

761 Bissonette, G. B., Martins, G. J., Franz, T. M., Harper, E. S., Schoenbaum, G., &

762 Powell, E. M. (2008). Double dissociation of the effects of medial and orbital

763 prefrontal cortical lesions on attentional and affective shifts in mice. *The Journal of*

764 *Neuroscience*, *28*(44), 11124–11130.

765 Bussey, T. J., Saksida, L. M., & Murray, E. A. (2002). Perirhinal cortex resolves feature

766 ambiguity in complex visual discriminations. *European Journal of Neuroscience*,

767 *15*(2), 365–374.

768 Bussey, T. J., Saksida, L. M., & Murray, E. A. (2006). Perirhinal cortex and

769 feature-ambiguous discriminations. *Learning & Memory*, *13*(2), 103–105.

- 770 Carlesimo, G. A., Marotta, L., & Vicari, S. (1997). Long-term memory in mental  
771 retardation: evidence for a specific impairment in subjects with down's syndrome.  
772 *Neuropsychologia*, *35*(1), 71–79.
- 773 Carretti, B. & Lanfranchi, S. [S]. (2010). The effect of configuration on vswm performance  
774 of down syndrome individuals. *Journal of Intellectual Disability Research*, *54*(12),  
775 1058–1066.
- 776 Connolly, B. H. & Michael, B. T. (1986). Performance of retarded children, with and  
777 without down syndrome, on the bruininks oseretsky test of motor proficiency.  
778 *Physical Therapy*, *66*(3), 344–348.
- 779 Cummings, B. J., Engesser-Cesar, C., Cadena, G., & Anderson, A. J. (2007). Adaptation  
780 of a ladder beam walking task to assess locomotor recovery in mice following spinal  
781 cord injury. *Behavioural brain research*, *177*(2), 232–241.
- 782 Das, I. & Reeves, R. H. (2011). The use of mouse models to understand and improve  
783 cognitive deficits in down syndrome. *Disease Models and Mechanisms*, *4*(5), 596–606.
- 784 Dees, R. L. & Kesner, R. P. (2013). The role of the dorsal dentate gyrus in object and  
785 object-context recognition. *Neurobiology of learning and memory*, *106*, 112–117.
- 786 Diep, A. A., Hunsaker, M. R., Kwock, R., Kim, K., Willemsen, R., & Berman, R. F.  
787 (2012). Female cgg knock-in mice modeling the fragile x premutation are impaired  
788 on a skilled forelimb reaching task. *Neurobiology of learning and memory*, *97*(2),  
789 229–234.
- 790 Edgin, J. O., Mason, G. M., Allman, M. J., Capone, G. T., DeLeon, I., Maslen, C., . . .  
791 Nadel, L. (2010). Development and validation of the arizona cognitive test battery  
792 for down syndrome. *Journal of neurodevelopmental disorders*, *2*(3), 149.
- 793 Edgin, J. O., Mason, G. M., Spano, G., Fernández, A., & Nadel, L. (2012). 7 human and  
794 mouse model cognitive phenotypes in down syndrome: implications for assessment.  
795 *Progress in brain research*, *197*, 123.

- 796 Edgin, J. O., Spano, G., Kawa, K., & Nadel, L. (2014). Remembering things without  
797 context: development matters. *Child development*, *85*(4), 1491–1502.
- 798 Escorihuela, R. M., Fernández-Teruel, A., Vallina, I. F., Baamonde, C., Lumbreras, M. A.,  
799 Dierssen, M., . . . Flórez, J. (1995). A behavioral assessment of ts65dn mice: a  
800 putative down syndrome model. *Neuroscience letters*, *199*(2), 143–146.
- 801 Faizi, M., Bader, P. L., Tun, C., Encarnacion, A., Kleschevnikov, A., Belichenko, P., . . .  
802 Mobley, W. C., et al. (2011). Comprehensive behavioral phenotyping of ts65dn  
803 mouse model of down syndrome: activation of beta 1-adrenergic receptor by  
804 xamoterol as a potential cognitive enhancer. *Neurobiology of Disease*, *43*(2),  
805 397–413.
- 806 Farr, T. D., Liu, L., Colwell, K. L., Whishaw, I. Q., & Metz, G. A. (2006). Bilateral  
807 alteration in stepping pattern after unilateral motor cortex injury: a new test  
808 strategy for analysis of skilled limb movements in neurological mouse models.  
809 *Journal of neuroscience methods*, *153*(1), 104–113.
- 810 Faul, F., Erdfelder, E., Buchner, A., & Lang, A.-G. (2009). Statistical power analyses  
811 using g\* power 3.1: tests for correlation and regression analyses. *Behavior research*  
812 *methods*, *41*(4), 1149–1160.
- 813 Faul, F., Erdfelder, E., Lang, A.-G., & Buchner, A. (2007). G\* power 3: a flexible  
814 statistical power analysis program for the social, behavioral, and biomedical sciences.  
815 *Behavior research methods*, *39*(2), 175–191.
- 816 Filali, M. & Lalonde, R. (2009). Age-related cognitive decline and nesting behavior in an  
817 appswe/ps1 bigenic model of alzheimer’s disease. *Brain research*, *1292*, 93–99.
- 818 Frith, U. & Frith, C. D. (1974). Specific motor disabilities in downs syndrome. *Journal of*  
819 *Child Psychology and Psychiatry*, *15*(4), 293–301.
- 820 Gallistel, C. R., Fairhurst, S., & Balsam, P. (2004). The learning curve: implications of a  
821 quantitative analysis. *Proceedings of the national academy of Sciences of the united*  
822 *States of america*, *101*(36), 13124–13131.



- 823 Gemus, M., Palisano, R., Russell, D., Rosenbaum, P., Walter, S. D., Galuppi, B., &  
824 Lane, M. (2002). Using the gross motor function measure to evaluate motor  
825 development in children with down syndrome. *Physical & Occupational Therapy in*  
826 *Pediatrics*, *21*(2-3), 69–79.
- 827 Goodrich-Hunsaker, N. J. & Hopkins, R. O. (2010). Spatial memory deficits in a virtual  
828 radial arm maze in amnesic participants with hippocampal damage. *Behavioral*  
829 *neuroscience*, *124*(3), 405.
- 830 Goodrich-Hunsaker, N. J., Hunsaker, M. R., & Kesner, R. P. (2005). Dissociating the role  
831 of the parietal cortex and dorsal hippocampus for spatial information processing.  
832 *Behavioral neuroscience*, *119*(5), 1307.
- 833 Goodrich-Hunsaker, N. J., Hunsaker, M. R., & Kesner, R. P. (2008). The interactions and  
834 dissociations of the dorsal hippocampus subregions: how the dentate gyrus, ca3, and  
835 ca1 process spatial information. *Behavioral neuroscience*, *122*(1), 16.
- 836 Hunsaker, M. R. (2012a). Comprehensive neurocognitive endophenotyping strategies for  
837 mouse models of genetic disorders. *Progress in neurobiology*, *96*(2), 220–241.
- 838 Hunsaker, M. R. (2012b). The importance of considering all attributes of memory in  
839 behavioral endophenotyping of mouse models of genetic disease. *Behavioral*  
840 *neuroscience*, *126*(3), 371.
- 841 Hunsaker, M. R. (2013). Neurocognitive endophenotypes in cgg ki and fmr1 ko mouse  
842 models of fragile x-associated disorders: an analysis of the state of the field.  
843 *F1000Research*, *2*.
- 844 Hunsaker, M. R. (2016). Applying the attribute model to develop behavioral tasks that  
845 phenocopy human clinical phenotypes using mouse disease models: an  
846 endophenotyping approach. In *The neurobiological basis of memory* (pp. 337–366).  
847 Springer.

- 848 Hunsaker, M. R., Goodrich-Hunsaker, N. J., Willemsen, R., & Berman, R. F. (2010).  
849 Temporal ordering deficits in female cgg ki mice heterozygous for the fragile x  
850 premutation. *Behavioural brain research*, *213*(2), 263–268.
- 851 Hunsaker, M. R., Kim, K., Willemsen, R., & Berman, R. F. (2012). Cgg trinucleotide  
852 repeat length modulates neural plasticity and spatiotemporal processing in a mouse  
853 model of the fragile x premutation. *Hippocampus*, *22*(12), 2260–2275.
- 854 Hunsaker, M. R., von Leden, R. E., Ta, B. T., Goodrich-Hunsaker, N. J., Arque, G.,  
855 Kim, K., . . . Berman, R. F. (2011). Motor deficits on a ladder rung task in male and  
856 female adolescent and adult cgg knock-in mice. *Behavioural brain research*, *222*(1),  
857 117–121.
- 858 Hunsaker, M. R., Wenzel, H. J., Willemsen, R., & Berman, R. F. (2009). Progressive  
859 spatial processing deficits in a mouse model of the fragile x premutation. *Behavioral*  
860 *neuroscience*, *123*(6), 1315.
- 861 Kesner, R. P., Farnsworth, G., & DiMattia, B. V. (1989). Double dissociation of egocentric  
862 and allocentric space following medial prefrontal and parietal cortex lesions in the  
863 rat. *Behavioral neuroscience*, *103*(5), 956.
- 864 Kesner, R. P. & Goodrich-Hunsaker, N. J. (2010). Developing an animal model of human  
865 amnesia: the role of the hippocampus. *Neuropsychologia*, *48*(8), 2290–2302.
- 866 Kesner, R. P., Hui, X., Sommer, T., Wright, C., Barrera, V. R., & Fanselow, M. S. (2014).  
867 The role of postnatal neurogenesis in supporting remote memory and spatial metric  
868 processing. *Hippocampus*, *24*(12), 1663–1671.
- 869 Kesner, R. P., Lee, I., & Gilbert, P. (2004). A behavioral assessment of hippocampal  
870 function based on a subregional analysis. *Reviews in the Neurosciences*, *15*(5),  
871 333–352.
- 872 Kesner, R. P. & Rolls, E. T. (2015). A computational theory of hippocampal function, and  
873 tests of the theory: new developments. *Neuroscience & Biobehavioral Reviews*, *48*,  
874 92–147.

- 875 Kleschevnikov, A. M., Belichenko, P. V., Faizi, M., Jacobs, L. F., Htun, K., Shamloo, M.,  
876 & Mobley, W. C. (2012). Deficits in cognition and synaptic plasticity in a mouse  
877 model of down syndrome ameliorated by gabab receptor antagonists. *The Journal of*  
878 *Neuroscience*, *32*(27), 9217–9227.
- 879 Kleschevnikov, A. M., Belichenko, P. V., Villar, A. J., Epstein, C. J., Malenka, R. C., &  
880 Mobley, W. C. (2004). Hippocampal long-term potentiation suppressed by increased  
881 inhibition in the ts65dn mouse, a genetic model of down syndrome. *The Journal of*  
882 *neuroscience*, *24*(37), 8153–8160.
- 883 Lanfranchi, S. [S], Carretti, B., Spano, G., & Cornoldi, C. (2009). A specific deficit in  
884 visuospatial simultaneous working memory in down syndrome. *Journal of Intellectual*  
885 *Disability Research*, *53*(5), 474–483.
- 886 Lanfranchi, S. [Silvia], Cornoldi, C., Vianello, R., & Conners, F. (2004). Verbal and  
887 visuospatial working memory deficits in children with down syndrome. *American*  
888 *Journal on Mental Retardation*, *109*(6), 456–466.
- 889 Lee, J. Y., Huerta, P. T., Zhang, J., Kowal, C., Bertini, E., Volpe, B. T., & Diamond, B.  
890 (2009). Neurotoxic autoantibodies mediate congenital cortical impairment of  
891 offspring in maternal lupus. *Nature medicine*, *15*(1), 91–96.
- 892 Lopez, L. L., Hauser, J., Feldon, J., Gargiulo, P., & Yee, B. (2010). Evaluating spatial  
893 memory function in mice: a within-subjects comparison between the water maze test  
894 and its adaptation to dry land. *Behavioural brain research*, *209*(1), 85–92.
- 895 Moore, S. J., Deshpande, K., Stinnett, G. S., Seasholtz, A. F., & Murphy, G. G. (2013).  
896 Conversion of short-term to long-term memory in the novel object recognition  
897 paradigm. *Neurobiology of learning and memory*, *105*, 174–185.
- 898 Pennington, B. F., Moon, J., Edgin, J., Stedron, J., & Nadel, L. (2003). The  
899 neuropsychology of down syndrome: evidence for hippocampal dysfunction. *Child*  
900 *development*, *74*(1), 75–93.

- 901 Ragozzino, M. E., Detrick, S., & Kesner, R. P. (1999). Involvement of the  
902 prelimbic–infralimbic areas of the rodent prefrontal cortex in behavioral flexibility for  
903 place and response learning. *The Journal of Neuroscience*, *19*(11), 4585–4594.
- 904 Ragozzino, M. E., Ragozzino, K. E., Mizumori, S. J., & Kesner, R. P. (2002). Role of the  
905 dorsomedial striatum in behavioral flexibility for response and visual cue  
906 discrimination learning. *Behavioral neuroscience*, *116*(1), 105.
- 907 Rast, M. M. & Harris, S. R. (1985). Motor control in infants with down syndrome.  
908 *Developmental Medicine & Child Neurology*, *27*(5), 682–685.
- 909 Reeves, R. H., Irving, N. G., Moran, T. H., Wohn, A., Kitt, C., Sisodia, S. S., ...  
910 Davisson, M. T. (1995). A mouse model for down syndrome exhibits learning and  
911 behaviour. *Nat. Genet*, *11*, 177–184.
- 912 Rolls, E. T. & Kesner, R. P. (2006). A computational theory of hippocampal function, and  
913 empirical tests of the theory. *Progress in neurobiology*, *79*(1), 1–48.
- 914 Sago, H., Carlson, E. J., Smith, D. J., Kilbridge, J., Rubin, E. M., Mobley, W. C., ...  
915 Huang, T.-T. (1998). Ts1cje, a partial trisomy 16 mouse model for down syndrome,  
916 exhibits learning and behavioral abnormalities. *Proceedings of the National Academy  
917 of Sciences*, *95*(11), 6256–6261.
- 918 Smith, G. K., Kesner, R. P., & Korenberg, J. R. (2014). Dentate gyrus mediates cognitive  
919 function in the ts65dn/dnj mouse model of down syndrome. *Hippocampus*, *24*(3),  
920 354–362.
- 921 Stedron, J. M., Sahni, S. D., & Munakata, Y. (2005). Common mechanisms for working  
922 memory and attention: the case of perseveration with visible solutions. *Journal of  
923 cognitive neuroscience*, *17*(4), 623–631.
- 924 Team, R. C. (2014). R: a language and environment for statistical computing. vienna,  
925 austria: r foundation for statistical computing; 2013.
- 926 Tennant, K. A., Asay, A. L., Allred, R. P., Ozburn, A. R., Kleim, J. A., & Jones, T. A.  
927 (2010). The vermicelli and capellini handling tests: simple quantitative measures of

- 928 dexterous forepaw function in rats and mice. *JoVE (Journal of Visualized*  
929 *Experiments)*, (41), e2076–e2076.
- 930 Vale-Martínez, A., Baxter, M. G., & Eichenbaum, H. (2002). Selective lesions of basal  
931 forebrain cholinergic neurons produce anterograde and retrograde deficits in a social  
932 transmission of food preference task in rats. *European Journal of Neuroscience*,  
933 *16*(6), 983–998.
- 934 Vicari, S. (2006). Motor development and neuropsychological patterns in persons with  
935 down syndrome. *Behavior genetics*, *36*(3), 355–364.
- 936 Vicari, S., Bellucci, S., & Carlesimo, G. A. (2005). Visual and spatial long-term memory:  
937 differential pattern of impairments in williams and down syndromes. *Developmental*  
938 *Medicine & Child Neurology*, *47*(05), 305–311.
- 939 Virji-Babul, N., Kerns, K., Zhou, E., Kapur, A., & Shiffar, M. (2006). Perceptual-motor  
940 deficits in children with down syndrome: implications for intervention. *Down*  
941 *Syndrome Research and Practice*, *10*(2), 74–82.
- 942 Visu-Petra, L., Benga, O., Miclea, M., et al. (2007). Visual-spatial processing in children  
943 and adolescents with down's syndrome: a computerized assessment of memory skills.  
944 *Journal of Intellectual Disability Research*, *51*(12), 942–952.
- 945 Warburton, E. C., Baird, A., Morgan, A., Muir, J. L., & Aggleton, J. P. (2001). The  
946 conjoint importance of the hippocampus and anterior thalamic nuclei for allocentric  
947 spatial learning: evidence from a disconnection study in the rat. *The Journal of*  
948 *Neuroscience*, *21*(18), 7323–7330.
- 949 Warburton, E., Baird, A. L., Morgan, A., Muir, J. L., & Aggleton, J. P. (2000).  
950 Disconnecting hippocampal projections to the anterior thalamus produces deficits on  
951 tests of spatial memory in rats. *European Journal of Neuroscience*, *12*(5), 1714–1726.
- 952 Zampieri, B. L., Fernandez, F., Pearson, J. N., Stasko, M. R., & Costa, A. C. (2014).  
953 Ultrasonic vocalizations during male–female interaction in the mouse model of down  
954 syndrome ts65dn. *Physiology & behavior*, *128*, 119–125.

Table 1

*Comparison of Arizona Cognitive Task Battery (ACTB) and Mouse Variant Reported in this Manuscript (mCTB)*

| Domain/Test in ACTB                                                      | Abilities Assessed                              | Analogous Task in mCTB                                        | Ts65Dn performance                                                    |
|--------------------------------------------------------------------------|-------------------------------------------------|---------------------------------------------------------------|-----------------------------------------------------------------------|
| <b><i>Benchmark, General Cognitive Ability</i></b>                       |                                                 |                                                               |                                                                       |
| KBIT-II Verbal Subscale                                                  | Receptive and Productive Language               | <i>not modeled</i>                                            | n/a                                                                   |
| KBIT-II Nonverbal Subscale                                               | Problem Solving                                 | <i>not modeled</i>                                            | n/a                                                                   |
| Scales of Independent Behavior-Revised (SIB-R)                           | Adaptive Function                               | Nesting, Neophobia                                            | <b>deficits for Adaptive Function</b>                                 |
| CANTAB Spatial Span                                                      | Immediate Memory for Spatiotemporal Information | Temporal Order for Visual Objects                             | <b>no deficits for Temporal Order</b>                                 |
| <b><i>Prefrontal Cortex - Executive Function, Response Attribute</i></b> |                                                 |                                                               |                                                                       |
| Modified Dots Task                                                       | Inhibitory Control and Working Memory           | Spontaneous Alternation                                       | <b>deficits for Spontaneous Alternation</b>                           |
| CANTAB IED                                                               | Set Shifting                                    | Rule Response Learning, Rule Reversal Learning                | <b>deficits for Response Learning, deficits for Reversal Learning</b> |
| <b><i>Medial Temporal Lobe - Spatial Attribute</i></b>                   |                                                 |                                                               |                                                                       |
| CANTAB PALS                                                              | Spatial Associative Memory                      | Location Recognition                                          | <b>deficits for Location Recognition</b>                              |
| Virtual Water Maze                                                       | Spatial Memory/Navigation                       | Dry Land Water Maze (Cheeseboard)                             | <b>deficits for Acquisition and Retrieval of Spatial Navigation</b>   |
| <i>not evaluated</i>                                                     | Spatial Relationships                           | Coordinate, Categorical                                       | <b>deficits for Coordinate task, no deficits for Categorical task</b> |
| <b><i>Medial Temporal Lobe - Temporal Attribute</i></b>                  |                                                 |                                                               |                                                                       |
| <i>not evaluated</i>                                                     | Temporal Processing/Sequence Learning           | Temporal Order for Visual Objects                             | <b>no deficits for Temporal Order</b>                                 |
| <b><i>Medial Temporal Lobe - Sensory/Perceptual Attribute</i></b>        |                                                 |                                                               |                                                                       |
| <i>not evaluated</i>                                                     | Object Recognition                              | Feature Ambiguity, Object Recognition, Novel Object Detection | <b>No deficits at 1 hour delay, deficits at 24 hour delay</b>         |
| <b><i>Cerebellum - Motor Function</i></b>                                |                                                 |                                                               |                                                                       |
| Finger Sequencing Task                                                   | Motor Sequencing                                | Capellini Handling                                            | <b>deficits for Motor Sequencing</b>                                  |
| NEPSY Visuomotor Precision                                               | Visuomotor Tracking/Hand-Eye Coordination       | Parallel Rung Walk, Capellini Handling                        | <b>deficits for Motor Coordination</b>                                |
| CANTAB SRT                                                               | Motor Response Time/Attention                   | <i>not modeled</i>                                            | n/a                                                                   |

*The mCTB was designed to model as many of the functions as the ACTB was designed to tests in humans. Cognitive deficits summarized in the table phenocopy the effects seen in Down syndrome on the ACTB or subsequent follow-up studies (Edgin et al., 2010, 2012). Similarly, the performance of Ts65Dn mice on the mCTB recapitulates intact cognitive function seen in participants with Down syndrome when tested using the ACTB*

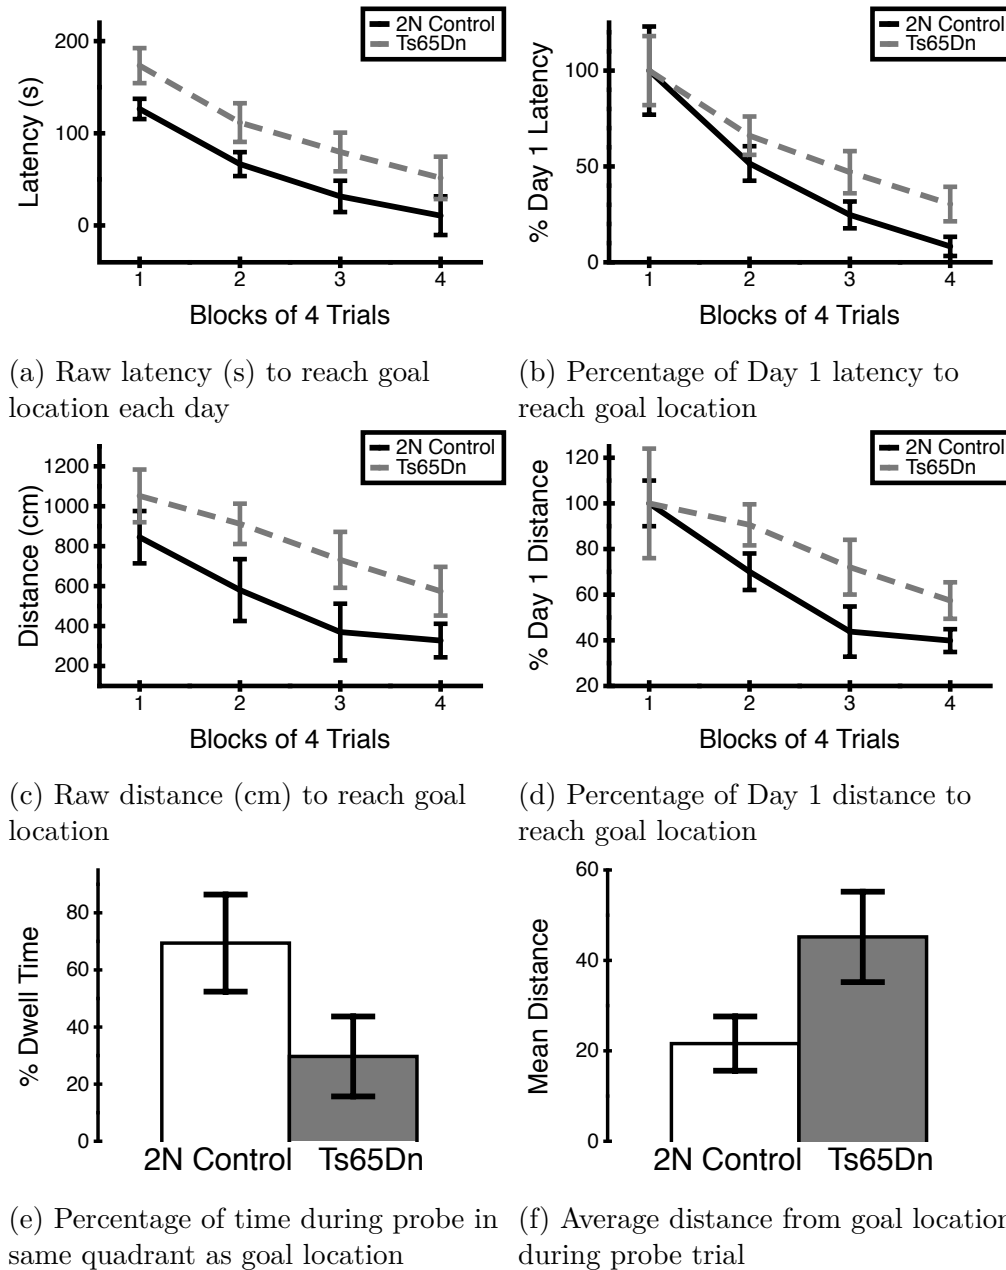

Figure 1. Dry land water maze performance on a cheeseboard for *Ts65Dn* and *2N* wildtype control mice. *Ts65Dn* mice showed impaired spatial navigation abilities during the 4 days of acquisition, even when adjusted for initial performance. *Ts65Dn* mice also show spatial memory deficits during the probe trial relative to *2N* wildtype control mice, reflected in reduced time in the quadrant containing the reward location and greater average distance from the previously rewarded location compared to *2N* control mice.

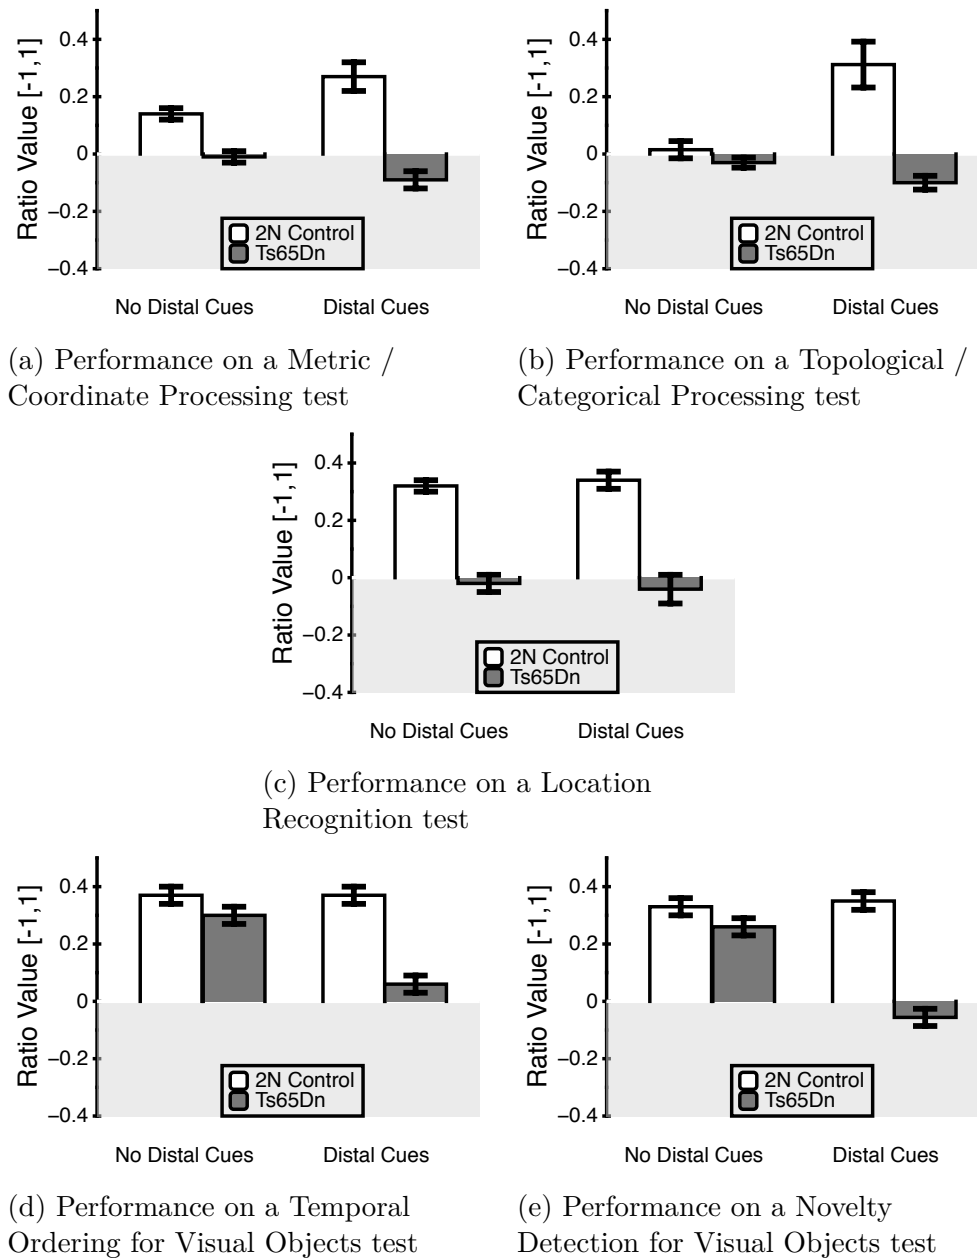

Figure 2. Spatial and Temporal Attribute task battery. The data suggest Ts65Dn mice show deficits relative to 2N wildtype control mice for location recognition and metric/coordinate processing, but no deficits for topological/categorical processing. The Ts65Dn mice do not show deficits for temporal ordering for visual objects compared to 2N wildtype control mice.



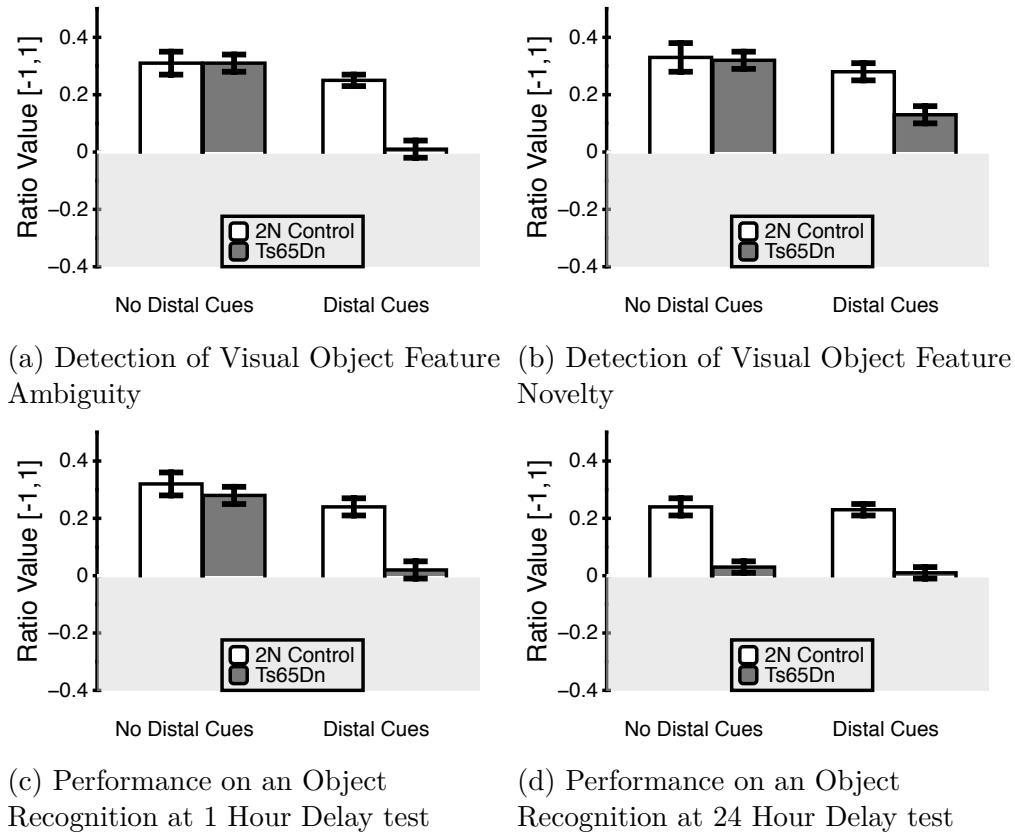

Figure 3. Sensory/Perceptual Attribute task battery. Overall, *Ts65Dn* mice do not show impaired sensory/perceptual function relative to *2N* wildtype mice. *Ts65Dn* mice also do not show deficits for object recognition at a 1 hour delay, but do show deficits for object recognition at 24 hour delays.

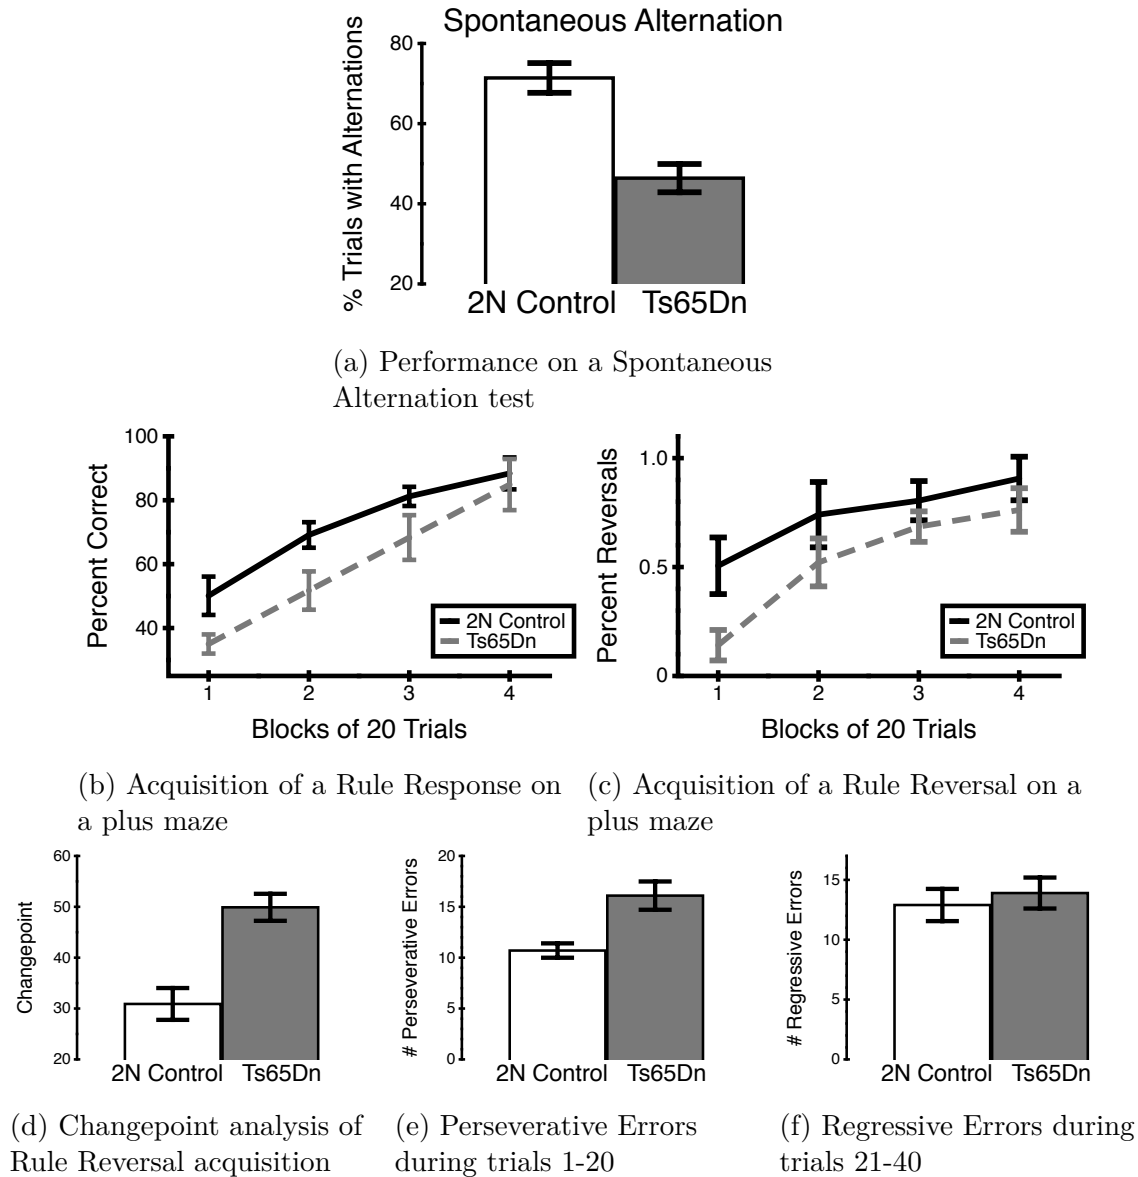

Figure 4. Executive Function / Rule Based Memory Task Battery. *Ts65Dn* mice show fewer alternations on a spontaneous alternation task relative to *2N* control mice. *Ts65Dn* mice show mild deficits for acquisition and reversal of a rule based response on a plus maze. During reversal training, *Ts65Dn* mice learn to apply the new rule on later trials than control mice, reflected by an increased number of perseverative, but not regressive, errors.

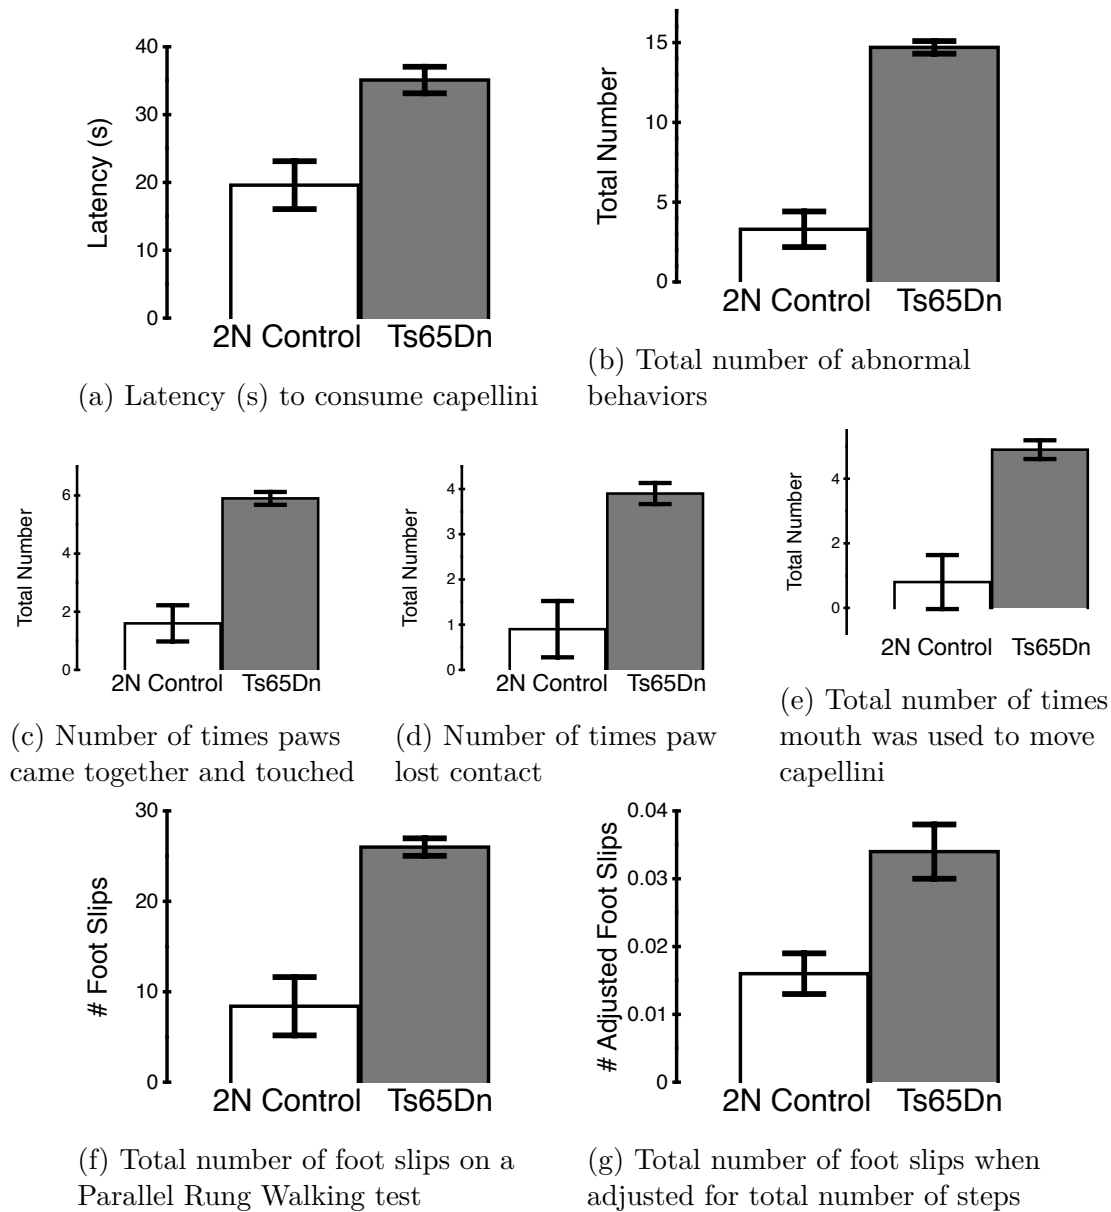

*Figure 5. Motor Function Task Battery. Ts65Dn mice showed reduced motor dexterity during a Capellini Handling task reflected as an increase in the number of abnormal behaviors and increased latency to consume the capellini as well a greater number of foot slips during a Parallel Rung Walking task, even when adjusted for total number of steps.*

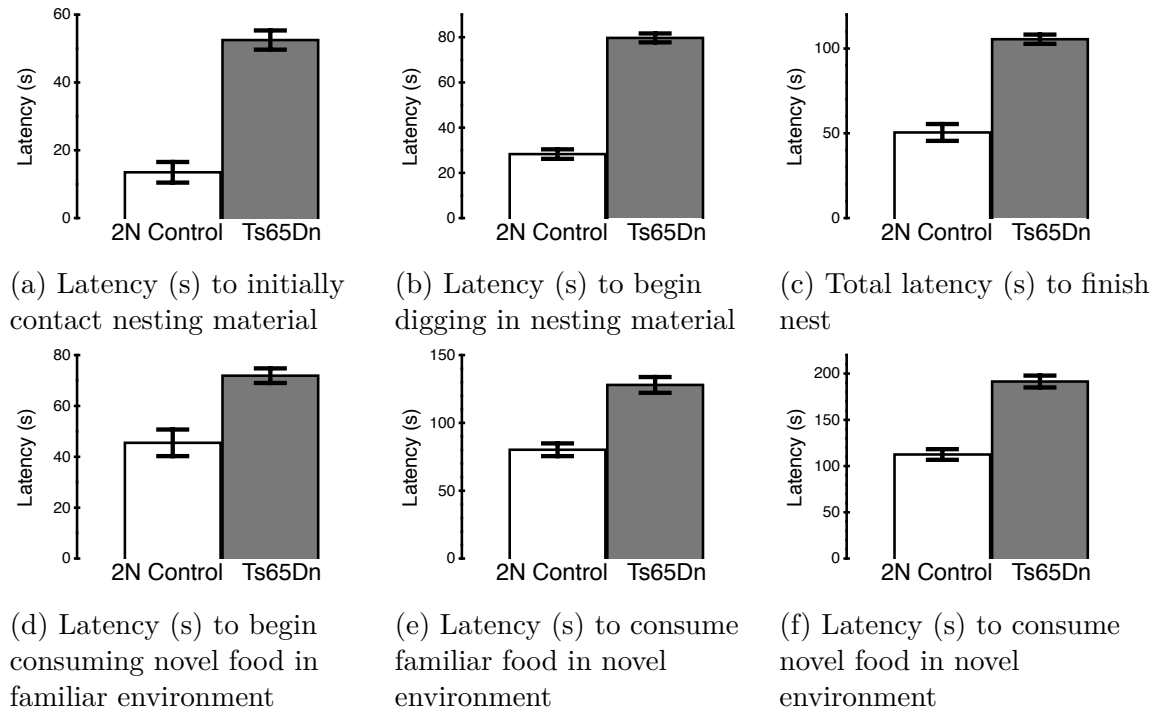

Figure 6. Adaptive Function / Quality of Life Task Battery. *Ts65Dn* mice take longer to make a nest out of preferred nesting material and show increased neophobia for both food and environments.
